# Supplementary material for: Establishment of a Machine Learning Model for the Risk Assessment of Perineural Invasion in Head and Neck Squamous Cell Carcinoma
Source: Int J Mol Sci. 2023 May 18;24(10):8938. doi: 10.3390/ijms24108938 (PMC10218829; doi:10.3390/ijms24108938)
Supplement: Supplementary file 1 [file ijms-24-08938-s001.zip › Supplemental_Tables.xlsx]

## Sheet: Suppl_Table_S1
Supplemental Table S1: Summary of data collection, online tools and software
Data collection
Description	Data types	Source	Link	Reference	Accession Date
TCGA-HNSC	Clinical data	cBioPortal	https://www.cbioportal.org/	PMID: 23550210, PMID: 22588877	2019-05-03
	Gene expression	GDC portal	https://www.cbioportal.org/	PMID: 23550210, PMID: 22588877	2019-05-03
	Mutation data	cBioPortal	https://www.cbioportal.org/	PMID: 23550210, PMID: 22588877	2020-09-15
		GDC portal	https://gdc.cancer.gov/about-data/publications/pancanatlas	PMID: 24071849	2020-09-15
	Copy number data (hg19)	FireBrowse, GDAC Portal	https://www.cbioportal.org/, http://firebrowse.org/	PMID: 23550210, PMID: 22588877	2020-09-15
		GDC portal	https://gdc.cancer.gov/about-data/publications/pancanatlas	PMID: 24071849	2020-09-15
	Methylation data	GDC portal	https://gdc.cancer.gov/about-data/publications/pancanatlas	PMID: 24071849	2020-09-15
	Immune cell scores	BostonGene	https://science.bostongene.com/kassandra/downloads		2022-12-21
	Digital H&E slides	Cancer Digital Slide Archive, Emory /Winship Cancer Institute	https://cancer.digitalslidearchive.org/#!/CDSA/hnsc		2022-10-07
GSE41613	Clinical data	GEO: GSE41613	https://www.ncbi.nlm.nih.gov/geo/query/acc.cgi	PMID: 23319825, PMID: 35464860	2020-10-16
	Gene expression	GEO: GSE41613	https://www.ncbi.nlm.nih.gov/geo/query/acc.cgi	PMID: 23319825, PMID: 35464860	2020-10-16
GSE117973	Clinical data	GEO: GSE117973	https://www.ncbi.nlm.nih.gov/geo/query/acc.cgi	PMID: 31135957, PMID: 32930393	2020-10-11
	Gene expression	GEO: GSE117973	https://www.ncbi.nlm.nih.gov/geo/query/acc.cgi		2019-10-10
GSE65858	Clinical data	GEO: GSE65858	https://www.ncbi.nlm.nih.gov/geo/query/acc.cgi	PMID: 26095926	2019-11-22
	Gene expression	GEO: GSE65858	https://www.ncbi.nlm.nih.gov/geo/query/acc.cgi	PMID: 26095926	2019-11-22
Molecular Signatures Database (MSigDB)	Gene sets (version 7.2)		https://www.gsea-msigdb.org/gsea/msigdb/index.jsp	PMID: 26771021	2020-10-07
TCGA cohorts of solid tumors	Clinical data	cBioPortal	https://www.cbioportal.org/	PMID: 23550210, PMID: 22588877	2021-05-06
	Gene expression	cBioPortal	https://www.cbioportal.org/		2021-05-06
scRNA-seq	Gene expression	Tumor Immune Single cell Hub 2 (TISCH2)	http://tisch.comp-genomics.org/	PMID: 33179754	2023-01-15
		GSE103322, GSE150430, GSE172577
Software and algorithms
Name	Version	Link	Reference
Biobase	2.46.0	https://cran.r-project.org/
BiocGenerics	0.32.0	https://cran.r-project.org/
caret	6.0-90	https://cran.r-project.org/
clusterProfiler	3.12.0	https://cran.r-project.org/	PMID: 22455463
ClustVis	1.0.0	https://biit.cs.ut.ee/clustvis/#editions	PMID: 25969447
ComplexHeatmap	2.0.0	https://cran.r-project.org/	PMID: 27207943
CoNVaQ	0.1.3	https://cran.r-project.org/	PMID: 29776329
dplyr	1.0.7	https://cran.r-project.org/
edgeR	3.26.8	https://cran.r-project.org/	PMID: 19910308
enrichplot	1.4.0	https://cran.r-project.org/
ggplot2	3.3.5	https://cran.r-project.org/
ggpubr	0.4.0	https://cran.r-project.org/
ggrepel	0.9.1	https://cran.r-project.org/
gmodels	2.18.1	https://cran.r-project.org/
graph	1.62.0	https://cran.r-project.org/
GSEABase	1.46.0	https://cran.r-project.org/	PMID: 16199517
GSVA	1.32.0	https://cran.r-project.org/	PMID: 23323831
IGV	2.8.0	http://www.broadinstitute.org/igv	PMID: 22517427
limma	3.40.6	https://cran.r-project.org/	PMID: 25605792
maftools	2.0.16	https://cran.r-project.org/
R Version	3.5.3	https://www.r-project.org/
RColorBrewer	1.1-2	https://cran.r-project.org/
readr	2.1.1	https://cran.r-project.org/
readxl	1.3.1	https://cran.r-project.org/
rlist	0.4.6.2	https://cran.r-project.org/
RStudio	1.2.1335	https://www.rstudio.com/
SPSS	26	https://www.ibm.com/de-de/products/spss-statistics
survival	3.2-13	https://cran.r-project.org/
survivalAnalysis	0.2.0	https://cran.r-project.org/
survminer	0.4.9	https://cran.r-project.org/
tblhelpr	0.2.0	https://cran.r-project.org/
tibble	3.1.6	https://cran.r-project.org/
tidyr	1.1.4	https://cran.r-project.org/
TISCH2	2	http://tisch.comp-genomics.org/	PMID: 33179754
tidyverse	1.3.1	https://cran.r-project.org/
Venny	2.1	https://bioinfogp.cnb.csic.es/tools/venny/
xgboost	1.5.0.2	https://cran.r-project.org/
XML	3.99-0.3	https://cran.r-project.org/

## Sheet: Suppl_Table_S2_Crosstabs
Supplemental Table S2. Associations between PNI and demographic, histopathological and clinical data of the TCGA-HNSC cohort
		PNI-negative		PNI-positive
Feature	Category	n		n		p value1
Age [years]	<60.9	101	0.51269	82	0.482353	0.635
	>60.9	96	0.48731	88	0.517647
Gender	male	148	0.751269	119	0.7	0.326
	female	49	0.248731	51	0.3
HPV162	no	150	0.810811	143	0.882716	0.0901
	yes	35	0.189189	19	0.117284
Tobacco	no	49	0.253886	39	0.233533	0.745
	yes	144	0.746114	128	0.766467
Alcohol	no	65	0.338542	47	0.279762	0.277
	yes	127	0.661458	121	0.720238
Subsite	nonOSCC	84	0.426396	35	0.205882	1.14e-05
	OSCC	113	0.573604	135	0.794118
Tumor size	pT1-pT2	91	0.47644	44	0.268293	8.93e-05
	pT3-pT4	100	0.52356	120	0.731707
Lymph node metastasis	pN0	90	0.511364	39	0.254902	3.5e-06
	pN+	86	0.488636	114	0.745098
Extracapsular spread	no	127	0.79375	75	0.535714	3.64e-06
	yes	33	0.20625	65	0.464286
Resection margin	R0	169	0.889474	141	0.854545	0.408
	R+	21	0.110526	24	0.145455
Angiolymphatic invasion	no	141	0.758065	77	0.52027	9.94e-06
	yes	45	0.241935	71	0.47973
Machine learning	ML A	125	0.675676	57	0.349693	1.237e-09
	ML B2	60	0.324324	106	0.650307
44-gene signature	Cluster A	113	0.71519	51	0.361702	1.8e-09
	Cluster B2	45	0.28481	90	0.638298
1 Chi square test; p values < 0.05 are indicated in bold
2 according to Sci Rep. 2016 Jun 24;6:28294. doi: 10.1038/srep28294

## Sheet: Suppl_Table_S3_DEGs
Supplemental Table S3. DEGs between PNI-negative and PNI-positive patients of the TCGA-HNSC cohort
Gene ID	Gene Symbol1	Chromosome	Regulation (PNI+ vs PNI-)	limma logFC	limma adj. P	edgeR logFC	edgeR adj. P	CNA (ML-A vs ML-B2)	p value
54097	FAM3B	21q22.3	down	-1.45734	0.00240515	-1.66378	4.53533e-07	gain	0.01
132724	TMPRSS11B	4q13.2	down	-1.4231	0.0113185	-1.00713	0.0166919	loss	0.01
54577	UGT1A7	2q37.1	down	-1.41941	0.0170464	-1.31499	0.00438521
53904	MYO3A	10p12.1	down	-1.37216	0.00502665	-1.92869	3.97399e-08	gain	0.01
2528	FUT6	19p13.3	down	-1.36287	0.00238725	-1.17671	9.65194e-05	gain	0.0001
4948	OCA2	15q12-q13.1	down	-1.32709	0.000951277	-1.64158	3.10899e-08
192666	KRT24	17q21.2	down	-1.32428	0.0323745	-1.51573	0.000633247
4585	MUC4	3q29	down	-1.27296	0.012664	-1.25222	0.000210529	gain	0.0001
27179	IL36A	2q14.1	down	-1.27234	0.0213144	-1.05873	0.00704639	gain	0.01
159296	NKX2-3	10q24.2	down	-1.2261	0.00495361	-2.22375	4.31659e-10	loss	0.01
51087	YBX2	17p13.1	down	-1.22171	0.00366967	-1.29603	1.15994e-05	loss	0.01
4880	NPPC	2q37.1	down	-1.2038	0.00352133	-2.528	5.47138e-13
2302	FOXJ1	17q25.1	down	-1.18634	0.0190102	-1.42858	0.000312977
344905	ATP13A5	3q29	down	-1.18145	0.0155995	-2.06051	1.64615e-06	gain	0.01
3167	HMX2	10q26.13	down	-1.17314	0.00305804	-1.05576	0.0366217	loss	0.01
1365	CLDN3	7q11.23	down	-1.13547	0.0190337	-1.97459	1.96709e-08	gain	0.0001
3131	HLF	17q22	down	-1.13367	0.000239106	-1.29881	9.11637e-10
399693	CCDC187	9q34.3	down	-1.12349	0.00682694	-1.34578	6.36705e-05
26084	ARHGEF26	3q25.2	down	-1.11575	0.00244267	-1.01983	4.23463e-05	gain	0.0001
84215	ZNF541	19q13.33	down	-1.1044	0.00429196	-1.43417	8.89055e-06
286256	LCN12	9q34.3	down	-1.10009	0.00026201	-2.12716	8.13065e-16
138065	RNF183	9q32	down	-1.09899	0.00702282	-2.13132	2.34308e-10
339766	MROH2A	2q37.1	down	-1.06627	0.0286057	-1.27528	0.000610966
66002	CYP4F12	19p13.12	down	-1.05809	0.00658358	-1.16148	1.24464e-05	gain	1e-06
3960	LGALS4	19q13.2	down	-1.05177	0.00113844	-1.75925	1.36978e-08	gain	0.01
11197	WIF1	12q14.3	down	-1.04907	0.0384781	-3.78252	1.16588e-14	gain	0.01
654790	PCP4L1	1q23.3	down	-1.04895	0.00794722	-1.03414	9.83198e-05	gain	1e-06
9951	HS3ST4	16p12.1	down	-1.04343	0.00888784	-1.32697	0.00151194	gain	0.0001
23217	ZFR2	19p13.3	down	-1.04172	0.0124297	-1.73462	1.75049e-05	gain	0.0001
4586	MUC5AC	11p15.5	down	-1.03721	0.0341977	-2.73104	3.07454e-09	loss	0.0001
388633	LDLRAD1	1p32.3	down	-1.03601	0.00482439	-1.25664	0.000455189	loss	0.01
89944	GLB1L2	11q25	down	-1.02519	0.00502665	-1.04657	2.67458e-05
1644	DDC	7p12.2-p12.1	down	-1.02307	0.00259683	-1.73148	7.11158e-06
89766	UMODL1	21q22.3	down	-1.02153	0.000951277	-1.59658	5.75439e-09
10734	STAG3	7q22.1	down	-1.01714	0.00056118	-1.77149	4.78193e-13	gain	0.01
9118	INA	10q24.33	down	-1.01169	0.03371	-1.2117	0.00177509	loss	0.01
151790	WDR49	3q26.1	down	-1.00556	0.00518723	-1.73481	4.91736e-08	gain	0.0001
10218	ANGPTL7	1p36.22	up	1.02348	0.00293737	1.37985	5.8706e-06	loss	1e-06
4617	MYF5	12q21.31	up	1.03194	0.00943593	1.0046	0.0332157
2250	FGF5	4q21.21	up	1.05195	0.00307234	1.05919	0.00150481	loss	0.0001
56832	IFNK	9p21.2	up	1.0676	0.00262957	2.42406	3.63777e-08
7054	TH	11p15.5	up	1.07436	0.0119453	1.00577	0.0030284	loss	1e-06
2352	FOLR3	11q13.4	up	1.07932	0.00601755	1.20647	3.85901e-05	gain	0.01
4312	MMP1	11q22.2	up	1.10676	0.000491094	1.10713	2.0647e-07	loss	0.01
4624	MYH6	14q11.2	up	1.13514	0.018287	1.15567	0.00984505
165904	XIRP1	3p22.2	up	1.20209	0.005288	1.03946	0.0007007
4621	MYH3	17p13.1	up	1.22551	0.00046198	1.60237	1.11383e-10	loss	0.0001
4635	MYL4	17q21.32	up	1.29451	8.56396e-05	2.43637	9.86431e-22
1146	CHRNG	2q37.1	up	1.34045	0.00198322	1.24777	0.000180619
4319	MMP10	11q22.2	up	1.48846	8.56396e-05	1.34489	5.28923e-08	loss	0.01
163782	KANK4	1p31.3	up	1.68332	1.44118e-05	1.10632	1.78877e-05	loss	0.01
1134	CHRNA1	2q31.1	up	1.76793	0.000108563	1.19652	0.000141303
389827	TMEM8C	9q34.2	up	1.76893	2.47613e-05	2.13756	1.58488e-07
845	CASQ2	1p13.1	up	1.77019	0.00046198	1.16426	0.000602519	loss	0.01
859	CAV3	3p25.3	up	1.84302	0.000422448	1.14543	0.0131216
23439	ATP1B4	Xq24	up	1.87892	0.00025066	1.32732	0.00220432
10777	ARPP21	3p22.3	up	1.97097	0.000422448	1.1879	0.0104535
27063	ANKRD1	10q23.31	up	2.17848	8.56396e-05	1.12801	0.00285716	loss	0.01
4626	MYH8	17p13.1	up	2.33513	3.49098e-05	2.65554	7.32062e-10	loss	0.01
4656	MYOG	1q32.1	up	2.47394	8.56396e-05	1.41224	0.00169039	gain	0.01
1 Muscle-related DEGs which were not considered for further analysis are indicated in red

## Sheet: Suppl_Table_S4_Crosstabs
Supplemental Table S4. Associations between clusters and demographic, histopathological and clinical data of the TCGA-HNSC cohort
		Cluster A		Cluster B1		Cluster B2
Feature	Category	n		n		n		p value1
Age [years]	<60.9	84	0.512195	23	0.479167	67	0.496296	0.91
	>60.9	80	0.487805	25	0.520833	68	0.503704
Gender	Male	136	0.834356	31	0.645833	88	0.656716	0.000692
	Female	27	0.165644	17	0.354167	46	0.343284
HPV162	no	122	0.77707	44	0.897959	121	0.930769	0.000758
	yes	35	0.22293	5	0.102041	9	0.0692308
Alcohol	no	20	0.277778	8	0.421053	16	0.275862	0.437
	yes	52	0.722222	11	0.578947	42	0.724138
Tobacco	no	27	0.16875	13	0.265306	37	0.284615	0.0508
	yes	133	0.83125	36	0.734694	93	0.715385
Keck et al.	basal	31	0.190184	25	0.510204	83	0.62406	< 2.2e-16
	inflamed/mesenchymal	38	0.233129	19	0.387755	40	0.300752
	classical	94	0.576687	5	0.102041	10	0.075188
Subsite	nonOSCC	84	0.512195	5	0.104167	21	0.155556	1.06e-12
	OSCC	80	0.487805	43	0.895833	114	0.844444
Tumor size	pT1 - pT2	54	0.3375	26	0.553191	44	0.34375	0.02
	pT3 - pT4	106	0.6625	21	0.446809	84	0.65625
Lymph node metastasis	pN0	62	0.416107	23	0.511111	35	0.304348	0.034
	pN+	87	0.583893	22	0.488889	80	0.695652
Extracapsular spread	no	92	0.69697	35	0.875	65	0.575221	0.0018
	yes	40	0.30303	5	0.125	48	0.424779
Resection margin	R0	135	0.85443	43	0.934783	116	0.878788	0.344
	R+	23	0.14557	3	0.0652174	16	0.121212
Angiolymphatic invasion	no	92	0.597403	36	0.8	77	0.652542	0.0432
	yes	62	0.402597	9	0.2	41	0.347458
Perineural invasion	no	113	0.689024	26	0.541667	45	0.333333	6.71e-09
	yes	51	0.310976	22	0.458333	90	0.666667
1 Chi square test; p values < 0.05 are indicated in bold
2 according to Sci Rep. 2016 Jun 24;6:28294. doi: 10.1038/srep28294

## Sheet: Suppl_Table_S5_Crosstabs
Supplemental Table S5. Associations between clusters and demographic, histopathological and clinical data of the validation cohort
			Cluster A		Cluster B1		Cluster B2
Validation cohort	Feature	Category	n		n		n		p value1
TCGA-HNSC NA	Age [years]	< 60.78	33	0.540984	11	0.289474	25	0.5	0.0414
		> 60.78	28	0.459016	27	0.710526	25	0.5
	Gender	Male	48	0.786885	21	0.552632	38	0.76	0.0302
		Female	13	0.213115	17	0.447368	12	0.24
	HPV162	no	24	0.428571	35	0.972222	47	0.979167	1.26e-12
		yes	32	0.571429	1	0.0277778	1	0.0208333
	Alcohol	no	14	0.233333	17	0.459459	17	0.354167	0.0653
		yes	46	0.766667	20	0.540541	31	0.645833
	Tobacco	no	12	0.20339	7	0.189189	13	0.265306	0.643
		yes	47	0.79661	30	0.810811	36	0.734694
	Subsite	nonOSCC	48	0.786885	17	0.447368	19	0.38	2.36e-05
		OSCC	13	0.213115	21	0.552632	31	0.62
	Tumor size	pT1 - pT2	24	0.4	16	0.432432	17	0.361702	0.802
		pT3 - pT4	36	0.6	21	0.567568	30	0.638298
	Lymphnode metastasis	pN0	15	0.441176	15	0.6	20	0.571429	0.405
		pN+	19	0.558824	10	0.4	15	0.428571
	Extracapsular spread	no	8	0.533333	17	0.809524	17	0.809524	0.114
		yes	7	0.466667	4	0.190476	4	0.190476
	Angiolymphatic invasion	no	5	0.714286	1	0.2	6	0.857143	0.0567
		yes	2	0.285714	4	0.8	1	0.142857
GSE117973	Age [years]	< 60.82	13	0.419355	4	0.666667	22	0.564103	0.357
		> 60.82	18	0.580645	2	0.333333	17	0.435897
	Gender	Male	26	0.83871	6	1	27	0.692308	0.135
		Female	5	0.16129	0	0	12	0.307692
	HPV16	no	11	0.34375	5	0.833333	39	0.95122	1.16e-07
		yes	21	0.65625	1	0.166667	2	0.0487805
	Alcohol	no	15	0.483871	2	0.333333	22	0.564103	0.525
		yes	16	0.516129	4	0.666667	17	0.435897
	Tobacco	no	10	0.322581	2	0.333333	12	0.307692	0.987
		yes	21	0.677419	4	0.666667	27	0.692308
	Subsite	nonOSCC	30	0.967742	6	1	21	0.538462	6.96e-05
		OSCC	1	0.0322581	0	0	18	0.461538
	T Status	pT1 - pT2	18	0.580645	4	0.666667	13	0.333333	0.0684
		pT3 - pT4	13	0.419355	2	0.333333	26	0.666667
	Lymphnode metastasis	pN0	12	0.387097	4	0.666667	20	0.512821	0.356
		pN+	19	0.612903	2	0.333333	19	0.487179
	Resection margin	R0	24	0.774194	5	0.833333	32	0.820513	0.873
		R+	7	0.225806	1	0.166667	7	0.179487
	Angiolymphatic invasion	no	5	0.263158	1	0.5	9	0.473684	0.38
		yes	14	0.736842	1	0.5	10	0.526316
GSE65858	Gender	Male	99	0.804878	37	0.840909	87	0.84466	0.705
		Female	24	0.195122	7	0.159091	16	0.15534
	HPV16	no	83	0.674797	34	0.772727	92	0.901961	0.00122
		yes	40	0.325203	10	0.227273	10	0.0980392
	Alcohol	no	19	0.154472	5	0.113636	7	0.0679612	0.1269
		yes	104	0.845528	39	0.886364	96	0.932039
	Tobacco	no	26	0.211382	6	0.136364	16	0.15534	0.4023
		yes	97	0.788618	38	0.863636	87	0.84466
	Subsite	nonOSCC	97	0.788618	31	0.704545	59	0.572816	0.002137
		OSCC	26	0.211382	13	0.295455	44	0.427184
1 Chi square test; p values < 0.05 are indicated in bold
2 according to Sci Rep. 2016 Jun 24;6:28294. doi: 10.1038/srep28294

## Sheet: Suppl_Table_S6_Conf_matrix
Supplemental Table S6. Confusion matrix of the tested classification models.
Characteristics	random forest	neural network	logistic regression
Accuracy	0.68	0.68	0.67
95% CI	0.62 - 0.73	0.63 - 0.73	0.62 - 0.73
p-value	8.79e-08	9.56e-08	8.79e-08
Sensitivity	0.64	0.72	0.64
Specifity	0.72	0.64	0.72
Positive prediction value	0.67	0.65	0.67
Negative prediction value	0.7	0.72	0.69

## Sheet: Suppl_Table_S7_Cox_regr_OS
Supplemental Table S7. Univariate and multivariate Cox regression analysis for the TCGA-HNSC cohort regarding OS.
		Univariate analysis (OS)				Multivariate analysis (OS) without PNI				Univariate analysis (DSS)				Multivariate analysis (DSS) without PNI				Univariate analysis (PFI)				Multivariate analysis (PFI) without PNI
Characteristics	Feature	Hazard ratio	95% CI	p-value		Hazard ratio	95% CI	p-value		Hazard ratio	95% CI	p-value		Hazard ratio	95% CI	p-value		Hazard ratio	95% CI	p-value		Hazard ratio	95% CI	p-value
Perineural Invasion	No1	2.022	1.404 – 2.912	0.00016						2.147	1.349 – 3.418	0.001						1.524	1.029 – 2.258	0.036
	Yes
Random forest model	ML_A1	1.54	1.145 - 2.072	0.00432		1.713	1.076 - 2.726	0.0231		1.803	1.23 - 2.643	0.0025		2.118	1.359 - 3.300	0.000915		1.473	1.068 - 2.032	0.0185		1.626	1.119 - 2.362	0.0106
	ML_B2
Sex	Female1	0.713	0.519 – 0.979	0.036		0.609	0.368 - 1.009	0.0546		1.031	0.658 – 1.616	0.89						0.981	0.681 – 1.411	0.92
	Male
Age [years]	≤611 [median]	1.326	0.987 - 1.782	0.061						1.122	0.765 - 1.646	0.56						1.033	0.752 - 1.419	0.84
	>61
Tobacco	No1	1.035	0.755 – 1.419	0.83						1.037	0.694 – 1.550	0.86						0.746	0.532 – 1.047	0.09
	Yes
Alcohol	No1	0.961	0.700 – 1.320	0.81						1.341	0.859 – 2.092	0.2						1.562	1.078 – 2.265	0.019		1.199	0.778 - 1.847	0.41
	Yes
HPV16	Negative1	0.61	0.393 – 0.947	0.028		0.505	0.120 - 2.119	0.35		0.666	0.385 – 1.153	0.15						0.757	0.488 – 1.174	0.21
	Positive
Tumor size	pT1-21	1.887	1.334 – 2.668	0.00033		4.572	2.480 - 8.429	1.12e-06		2.473	1.523 – 4.016	0.00025		3.697	2.034 - 6.717	1.78e-05		1.89	1.297 – 2.753	0.001		2.112	1.371 - 3.252	0.00069
	pT3-4
	cT1-21	1.122	0.783 - 1.608	0.53						1.028	0.651 - 1.621	0.91						1.145	0.778 - 1.683	0.49
	cT3-4
Lymph node metastasis	pN01	1.9	1.332 – 2.711	0.0004		1.438	0.814 - 2.538	0.211		2.333	1.431 – 3.804	0.001		1.836	1.104 - 3.056	0.0193		1.545	1.062 – 2.249	0.023		1.41	0.938 - 2.120	0.0986
	pN+
	cN01	1.16	0.863 - 1.559	0.33						1.179	0.802 - 1.733	0.4						1.023	0.742 - 1.409	0.89
	cN+
Pathological grading	G1-21	0.893	0.636 - 1.255	0.51						0.935	0.605 - 1.443	0.76						0.922	0.640 - 1.328	0.66
	G3-4
Radiotherapy	No1	0.585	0.417 - 0.819	0.002		0.38	0.229 - 0.629	0.000163		1.096	0.662 - 1.814	0.72						1.428	0.942 - 2.165	0.093
	Yes
Resection margin	R01	1.616	1.093 - 2.389	0.016		2.412	1.351 - 4.306	0.0029		2.245	1.414 - 3.564	0.001		1.755	1.039 - 2.966	0.0356		1.932	1.275 - 2.928	0.002		1.44	0.869 - 2.387	0.157
	R+
Angiolymphatic Invasion	No1	1.734	1.203 – 2.498	0.003		1.701	1.061 - 3.067	0.0291		1.579	0.988 – 2.523	0.056						1.16	0.764 – 1.761	0.49
	Yes

## Sheet: Suppl. Table S8_WSI
Supplemental Table S8. Samples for whole slide image analysis
Case ID	clinical PNI status	Random forest model	re-evaluation	# slides at CDSA
TCGA-4P-AA8J	NA	B2	PNI+	2
TCGA-CV-6943	NA	B2	PNI+	4
TCGA-CV-7178	NA	B2	PNI+	4
TCGA-CN-5363	PNI-	B2	PNI+	3
TCGA-HD-8635	PNI-	B2	PNI+	2
TCGA-P3-A5Q6	PNI-	B2	PNI+	2
TCGA-WA-A7GZ	NA	B2	/	4
TCGA-CN-5355	PNI-	B2	/	3
TCGA-IQ-A61L	PNI-	B2	/	2
TCGA-F7-A61W	PNI-	B2	/	2
TCGA-CV-A45Q	NA	B2	/	2
TCGA-CV-A6K1	NA	B2	/	2

## Sheet: Suppl_Table_S9_Tumors
Supplemental Table S9. Classification of other solid tumor from TCGA by the radom foret model
Tumor entities (TCGA cohorts)	ML A	ML B2	Log rank p-value (OS)
HNSC (head and neck squamous cell carcinoma)	275	225	0.0043
CESC (cervix squamous cell carcinoma)	246	60	0.027
LUAD (lung adenocarcinoma)	198	32	0.051
PAAD (pancreatic adenocarcinoma)	130	49	0.099
COAD (colorectal adenocarcinoma)	326	56	0.1
BLCA (bladder urothelial carcinoma)	332	76	0.49
OV (ovarian serous cystadenocarcinoma)	275	32	0.49
STAD (stomach adenocarcinoma)	363	52	0.54
ESCA (esophageal squamous cell carcinoma)	161	24	0.76

## Sheet: Suppl_Table_S10_DPE
Supplemental Table S10. Altered expression of Hallmark gene sets from MSigDB between ML-A and ML-B2 of TCGA-HNSC
Pathways	Regulation (ML B2 vs ML A)	log2FC	adj.P.Val
HALLMARK_APICAL_JUNCTION	up	0.226529	6.89763e-36
HALLMARK_COAGULATION	up	0.237237	8.29171e-30
HALLMARK_EPITHELIAL_MESENCHYMAL_TRANSITION	up	0.354058	2.14308e-27
HALLMARK_COMPLEMENT	up	0.225349	9.89919e-26
HALLMARK_ANGIOGENESIS	up	0.296358	9.96258e-26
HALLMARK_INFLAMMATORY_RESPONSE	up	0.252928	8.05778e-23
HALLMARK_APOPTOSIS	up	0.147568	1.97705e-22
HALLMARK_SPERMATOGENESIS	down	-0.111371	3.82385e-20
HALLMARK_INTERFERON_ALPHA_RESPONSE	up	0.378354	5.97232e-20
HALLMARK_TNFA_SIGNALING_VIA_NFKB	up	0.236323	2.29527e-19
HALLMARK_INTERFERON_GAMMA_RESPONSE	up	0.302931	9.13203e-19
HALLMARK_IL6_JAK_STAT3_SIGNALING	up	0.224752	3.31047e-18
HALLMARK_KRAS_SIGNALING_UP	up	0.17574	1.59431e-17
HALLMARK_TGF_BETA_SIGNALING	up	0.200142	1.55941e-16
HALLMARK_IL2_STAT5_SIGNALING	up	0.154905	7.59449e-16
HALLMARK_HYPOXIA	up	0.161915	4.10006e-15
HALLMARK_MYOGENESIS	up	0.205847	4.18715e-15
HALLMARK_P53_PATHWAY	up	0.111382	2.25089e-11
HALLMARK_PANCREAS_BETA_CELLS	up	0.109493	8.69829e-11
HALLMARK_UV_RESPONSE_DN	up	0.140149	7.22773e-09
HALLMARK_FATTY_ACID_METABOLISM	down	-0.0898609	2.52058e-08
HALLMARK_PROTEIN_SECRETION	up	0.122758	2.62291e-08
HALLMARK_ALLOGRAFT_REJECTION	up	0.166808	7.72185e-08
HALLMARK_GLYCOLYSIS	up	0.082896	3.93615e-07
HALLMARK_PEROXISOME	down	-0.0607362	9.25709e-07
HALLMARK_PI3K_AKT_MTOR_SIGNALING	up	0.0737436	1.07357e-06
HALLMARK_APICAL_SURFACE	up	0.0782915	3.83585e-06
HALLMARK_ADIPOGENESIS	down	-0.0639153	1.04726e-05
HALLMARK_BILE_ACID_METABOLISM	down	-0.0532959	0.00010434
HALLMARK_OXIDATIVE_PHOSPHORYLATION	down	-0.110403	0.000185315
HALLMARK_E2F_TARGETS	down	-0.132825	0.000235169
HALLMARK_ANDROGEN_RESPONSE	up	0.0664792	0.000375591
HALLMARK_UNFOLDED_PROTEIN_RESPONSE	up	0.0603419	0.00100378
HALLMARK_NOTCH_SIGNALING	up	0.0606922	0.00121028
HALLMARK_HEDGEHOG_SIGNALING	up	0.076095	0.00155082
HALLMARK_REACTIVE_OXYGEN_SPECIES_PATHWAY	down	-0.0703495	0.00175031
HALLMARK_HEME_METABOLISM	up	0.0370067	0.00274977
HALLMARK_G2M_CHECKPOINT	down	-0.0931354	0.00347129
HALLMARK_UV_RESPONSE_UP	up	0.0390535	0.00352182
HALLMARK_ESTROGEN_RESPONSE_EARLY	up	0.0369717	0.0426655
